# Supplementary material for: Automated solid-phase spectrophotometric system for optosensing of bromate in drinking waters
Source: Royal Society of Chemistry journal article supplement (doi:10.1039/c2ay05860j), 2012-01-01
Supplement: c2ay05860j.pdf [file c2ay05860j.pdf]

## Electronic supplementary information

### Automated solid-phase spectrophotometric system for optosensing of bromate in drinking waters

Sara M. Oliveira,<sup>a</sup> Hugo M. Oliveira,<sup>b</sup> Marcela A. Segundo,<sup>b</sup> António O. S. S. Rangel,<sup>\*a</sup>

José L. F. C. Lima,<sup>b</sup> Víctor Cerdà<sup>c</sup>

<sup>a</sup>*CBQF - Escola Superior de Biotecnologia, Universidade Católica Portuguesa, Rua Dr. António Bernardino de Almeida, 4200-072 Porto, Portugal*

<sup>b</sup>*REQUIMTE, Departamento de Química, Faculdade de Farmácia, Universidade do Porto, Rua de Jorge Viterbo Ferreira, 228, 4050-313 Porto, Portugal*

<sup>c</sup>*Department of Chemistry, University of the Balearic Islands, Carretera de Valldemossa km 7.5, E- 07122 Palma de Mallorca, Spain*

\* Corresponding author. \*Fax: +351 225090351; Tel.: +351 225580064; E-mail: arangel@porto.ucp.pt

**Table S1** Protocol sequence for the determination of bromate in drinking waters using solid phase spectrophotometry.

| Step | Description                                                                     | Position of the commutation valves <sup>a</sup> |                |                |                |                |                |                |                | Time<br>/ s | Volume <sup>b</sup><br>/ $\mu\text{L}$ | Flow rate <sup>b</sup> /<br>$\text{mL min}^{-1}$ |
|------|---------------------------------------------------------------------------------|-------------------------------------------------|----------------|----------------|----------------|----------------|----------------|----------------|----------------|-------------|----------------------------------------|--------------------------------------------------|
|      |                                                                                 | V <sub>1</sub>                                  | V <sub>2</sub> | V <sub>3</sub> | V <sub>4</sub> | V <sub>5</sub> | V <sub>6</sub> | V <sub>7</sub> | V <sub>8</sub> |             |                                        |                                                  |
| 1    | The sorbent is conditioned                                                      | F                                               | N              | N              | F              | F              | F              | F              | F              | 60          | 2000                                   | 2                                                |
| 2    | Chlorpromazine and sample are aspirated into the injection loop                 | N                                               | F              | F              | F              | N              | N              | * <sup>c</sup> | F              | 48          | 8000                                   | 10                                               |
| 3    | Reaction product is formed and directed towards pre-concentration and detection | F                                               | N              | N              | F              | F              | F              | F              | F              | 240         | 8000                                   | 2                                                |
| 4    | Syringes are refilled                                                           | F                                               | F              | F              | F              | F              | F              | F              | F              | 9           | 3000                                   | 20                                               |
| 5    | Reaction product is eluted and the optosensor is regenerated                    | F                                               | F              | F              | N              | F              | F              | F              | N              | 60          | 3000                                   | 3                                                |
| 6    | Syringes are refilled                                                           | F                                               | F              | F              | F              | F              | F              | F              | F              | 6           | 2000                                   | 20                                               |

<sup>a</sup> N and F represent positions “on” and “off”, respectively.

<sup>b</sup> The indicated volumes and flow rates correspond to syringe 1 (10 mL).

<sup>c</sup> This valve switches between positions “on” and “off” at 1 Hz.

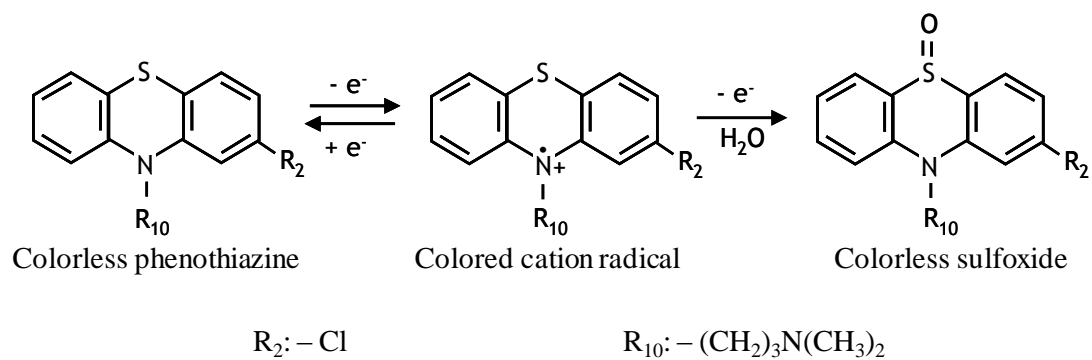

**Fig. S1** Schematic representation of the oxidative process of chlorpromazine, originating a colored cation radical.

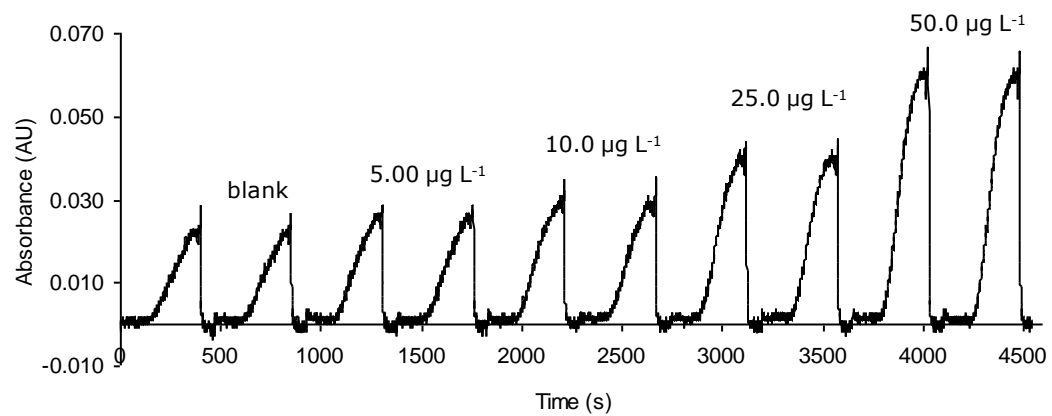

**Fig. S2** Analytical signals recorded for a calibration curve using bromated standard solutions between 5.0 and 50.0 µg L<sup>-1</sup>.
